# Supplementary material
Source: PubMed Central journal article supplement (PMC6426663)
Supplement: NIHMS1521403-supplement-Supporting_Information.pdf [file NIHMS1521403-supplement-Supporting_Information.pdf]

# Gold Nanoparticles with Antibiotic-Metallopolymers toward Broad-Spectrum Antibacterial Effect

Peng Yang,<sup>†¶</sup> Parasmani Pagani,<sup>†¶</sup> Md Anisur Rahman,<sup>†</sup> Marpe Bam,<sup>‡</sup> Tianyu Zhu,<sup>†</sup>

Yung Pin Chen,<sup>§</sup> Mitzi Nagarkatti,<sup>‡</sup> Alan W. Decho<sup>§</sup> and Chuanbing Tang<sup>\*†</sup>

<sup>†</sup>Department of Chemistry and Biochemistry, University of South Carolina, Columbia, South Carolina 29208, United States

<sup>‡</sup>Department of Pathology, Microbiology and Immunology, University of South Carolina, School of Medicine, Columbia, South Carolina 29209, United States

<sup>§</sup>Department of Environmental Health Sciences, Arnold School of Public Health, University of South Carolina, Columbia, South Carolina 29208, United States

\* Corresponding author. E-mail: tang4@mailbox.sc.edu.

## Supplementary Information

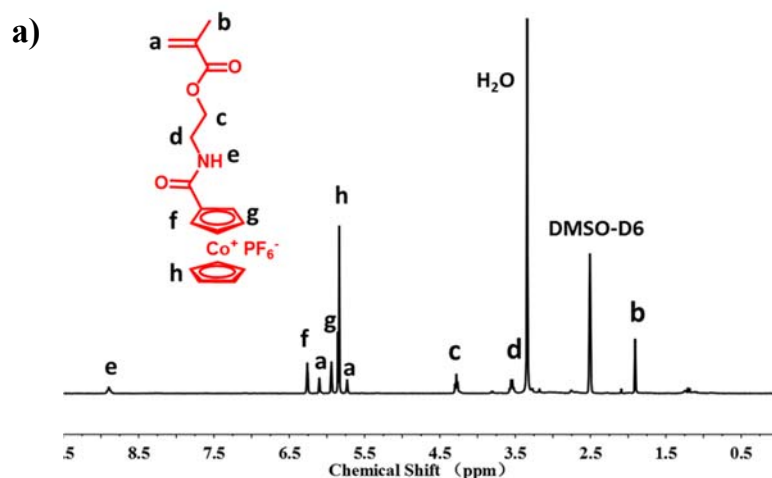

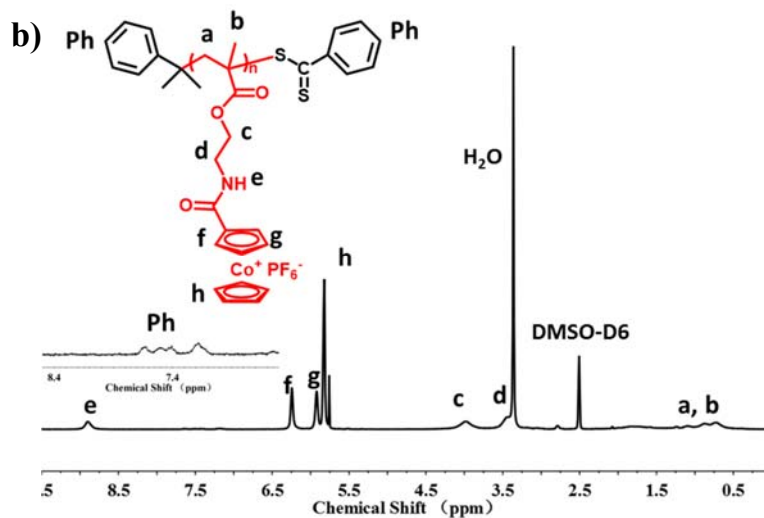

**Figure S1.**  $^1\text{H}$  NMR spectra of (a) cobaltocenium monomer CoAEMA and (b) cobaltocenium polymer PCoAEMA via RAFT polymerization.

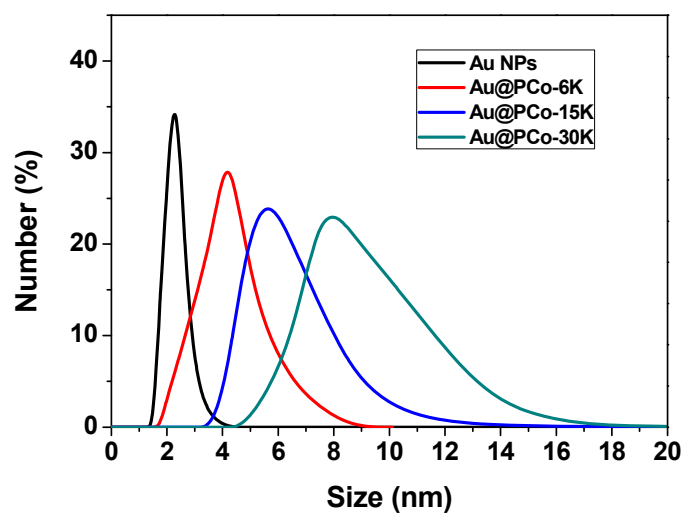

**Figure S2.** Size distribution of Au NPs, and Au@PCo NPs with different cobaltocenium polymer molecular weights tested by DLS.

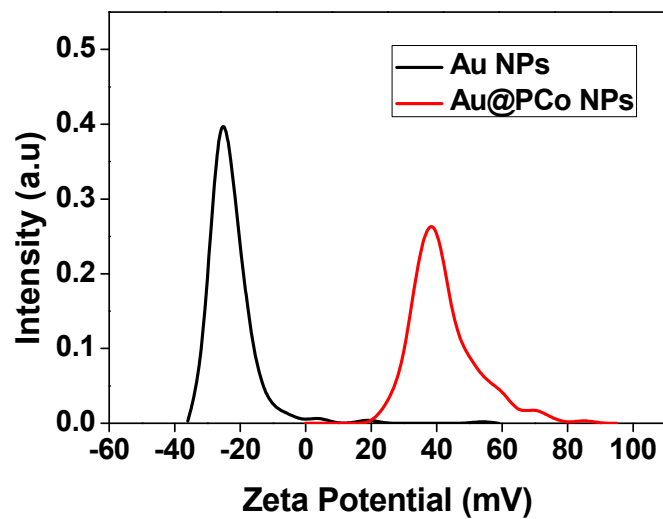

Figure S3. Zeta potential data of Au NPs and Au@PCo NPs.

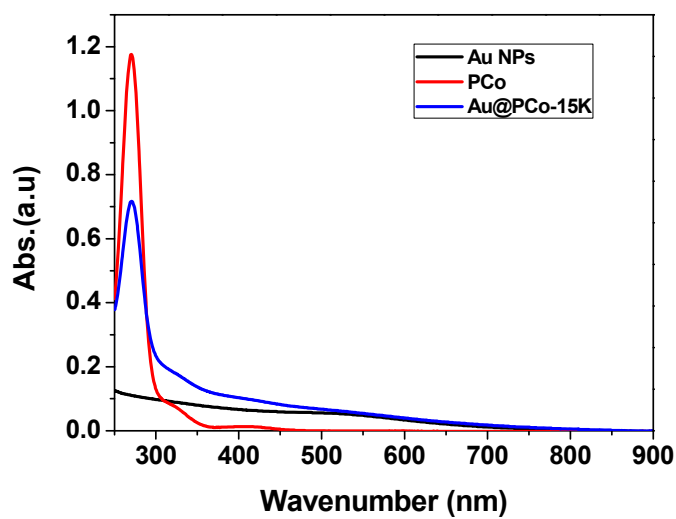

Figure S4. UV-vis absorption spectra of Au NPs, PCo homopolymers and Au@PCo NPs.

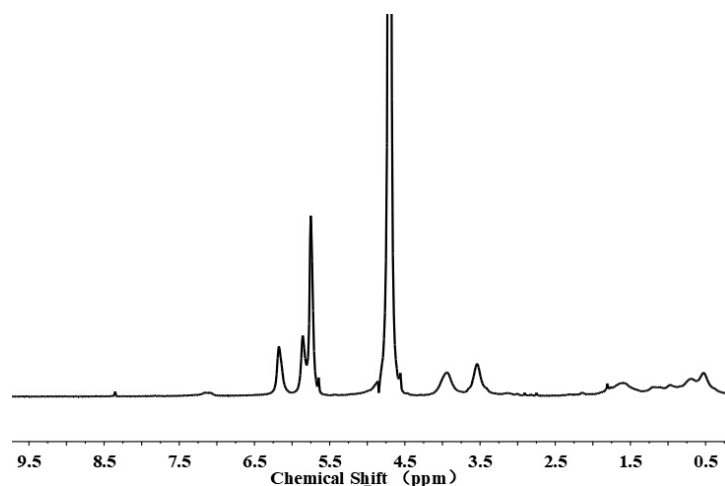

**Figure S5.**  $^1\text{H}$  NMR spectrum of Au@PCo NPs in  $\text{D}_2\text{O}$ .

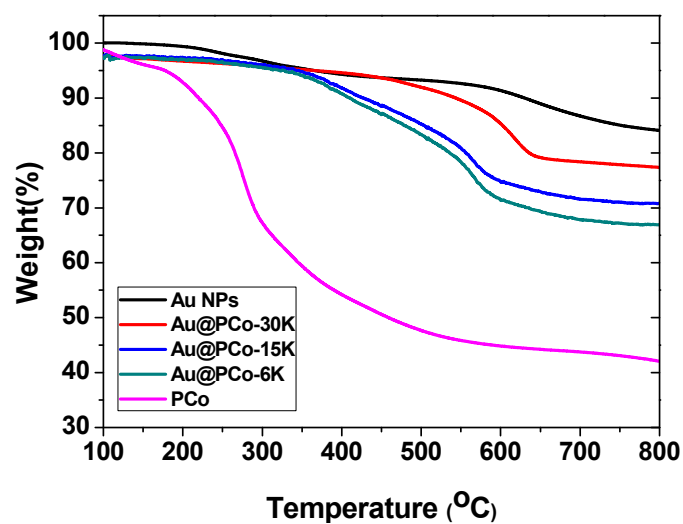

**Figure S6.** TGA data of Au NPs, PCo homopolymers and Au@PCo NPs with different cobaltocenium polymer molecular weights.

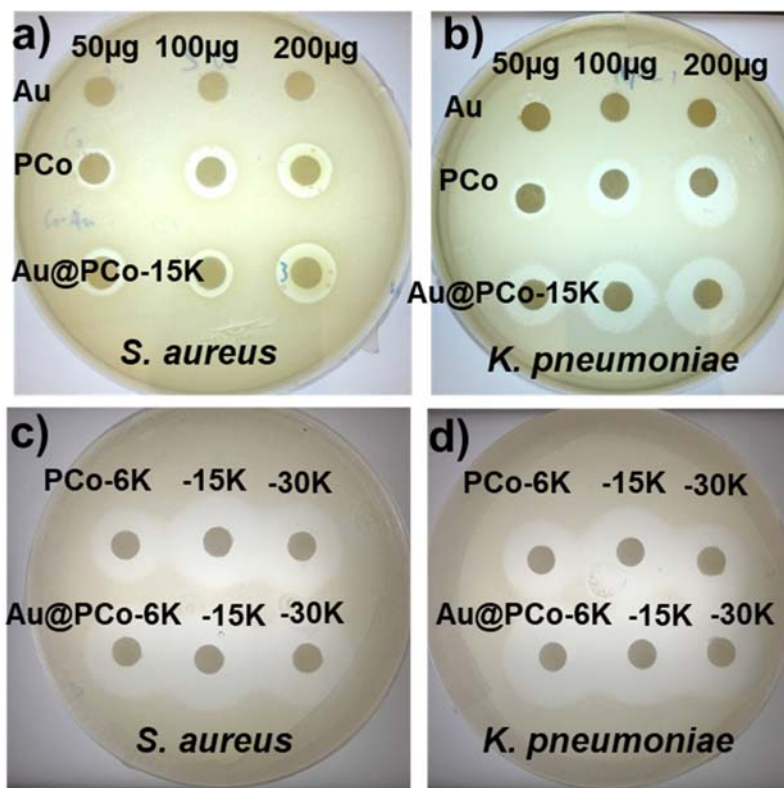

**Figure S7.** Antimicrobial effect of Au NPs, PCo homopolymers and Au@PCo NPs with different molecular weight of cobaltocenium polymers against Gram-positive bacteria using disk-diffusion assays. All compounds with different amount (50,100 and 200 µg for a) and b); 300 µg for c) and d) in 30 µL water (DMSO for Au NPs) was added to disks, and the plates were incubated at 28 °C for 18 h.

**Table S1.** The Minimum Inhibitory Concentrations of different cationic cobaltocenium polymers and Au@PCo NPs against Gram-positive and Gram-negative strains.

| Bacteria            | Minimum Inhibitory Concentration<br>(MIC, $\mu\text{g/mL}$ ) |             |             |               |                |                |
|---------------------|--------------------------------------------------------------|-------------|-------------|---------------|----------------|----------------|
|                     | PCo-<br>6K                                                   | PCo-<br>15K | PCo-<br>30K | Au@PCo-<br>6K | Au@PCo-<br>15K | Au@PCo-<br>30K |
| <i>S. aureus</i>    | 136                                                          | 100         | 121         | 95            | 54             | 76             |
| <i>K. pneumonia</i> | 125                                                          | 87          | 120         | 53            | 49             | 61             |

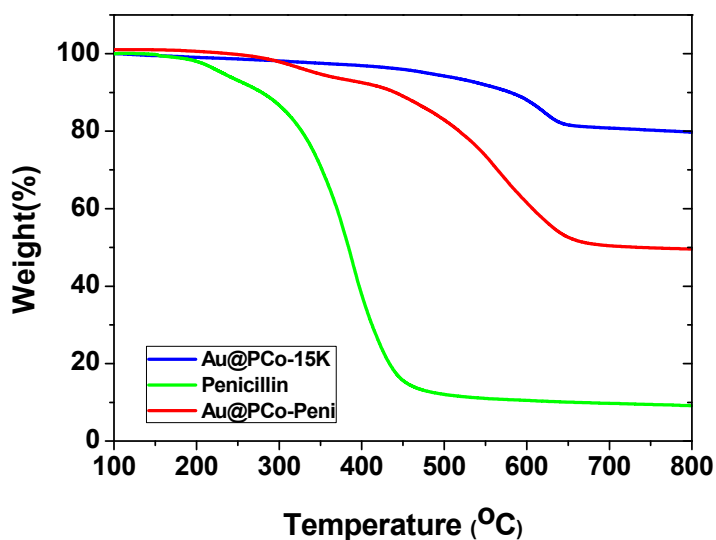

**Figure S8.** TGA data of Au@PCo-15K NPs, penicillin-G and Au@PCo-Peni.

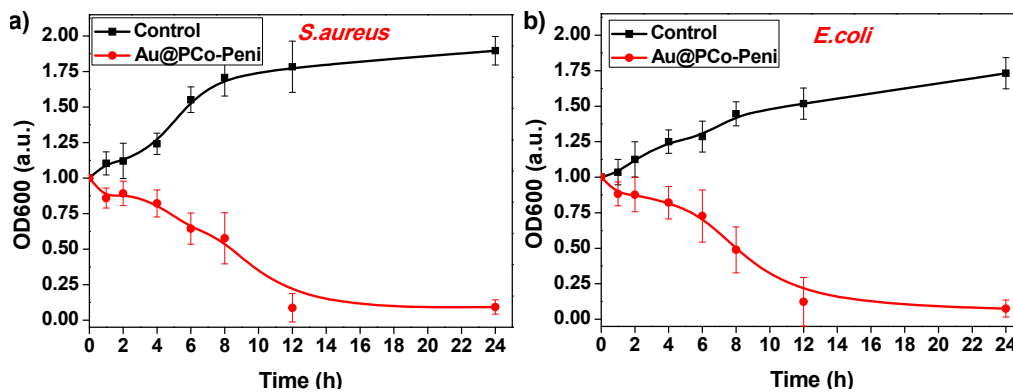

**Figure S9.** Time-kill curves of Au@PCo-Peni NPs against *S. aureus* and *E. coli*. Bactericidal activities were monitored for 24 h. The bacterial TSB solution without conjugates was used as the control.

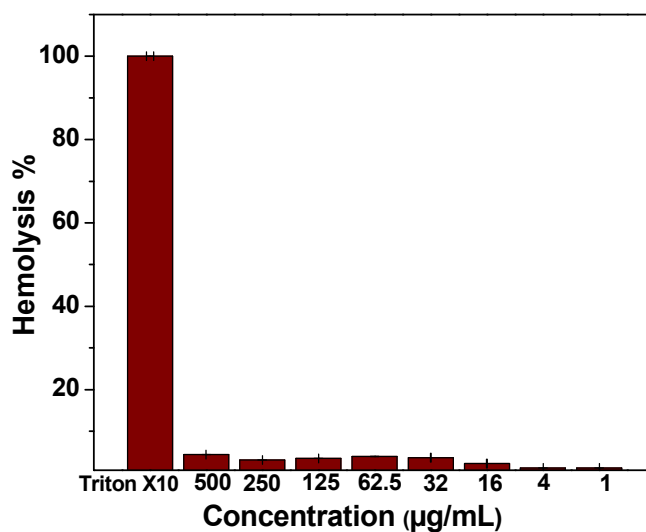

**Figure S10.** The toxicity test of Au@PCo-15K NPs at different concentrations on red blood cells (RBCs) by evaluating whether they could lead to hemolysis of RBCs.
